1 **Cas9-mediated endogenous plasmid loss in *Borrelia burgdorferi***

2

3 Constantin N. Takacs<sup>1,2,3</sup>, Yuko Nakajima<sup>4</sup>, James E. Haber<sup>4</sup>, and Christine Jacobs-Wagner<sup>1,2,3,\*</sup>

4

5 <sup>1</sup>Department of Biology, Stanford University, Palo Alto, CA 94305.

6 <sup>2</sup>Sarafan ChEM-H Institute, Stanford University, Palo Alto, CA 94305.

7 <sup>3</sup>Howard Hughes Medical Institute, Stanford University, Palo Alto, CA 94305.

8 <sup>4</sup>Department of Biology and Rosenstiel Basic Medical Sciences Research Center, Brandeis University,  
9 Waltham, MA 02454.

10 \*Corresponding author: [jacobs-wagner@stanford.edu](mailto:jacobs-wagner@stanford.edu).

## 11 **ABSTRACT**

12 The spirochete *Borrelia burgdorferi*, which causes Lyme disease, has the most segmented genome  
13 among known bacteria. In addition to a linear chromosome, the *B. burgdorferi* genome contains over 20  
14 linear and circular endogenous plasmids. While many of these plasmids are dispensable under in vitro  
15 culture conditions, they are maintained during the natural life cycle of the pathogen. Plasmid-encoded  
16 functions are required for colonization of the tick vector, transmission to the vertebrate host, and evasion  
17 of host immune defenses. Different *Borrelia* strains can vary substantially in the type of plasmids they  
18 carry. The gene composition within the same type of plasmid can also differ from strain to strain,  
19 impeding the inference of plasmid function from one strain to another. To facilitate the investigation of  
20 the role of specific *B. burgdorferi* plasmids, we developed a Cas9-based approach that targets a plasmid  
21 for removal. As a proof-of-principle, we showed that targeting wild-type Cas9 to several loci on the  
22 endogenous plasmids lp25 or lp28-1 of the *B. burgdorferi* type strain B31 results in sgRNA-specific  
23 plasmid loss even when homologous sequences (i.e., potential sequence donors for DNA recombination)  
24 are present nearby. Cas9 nickase versions, Cas9<sup>D10A</sup> or Cas9<sup>H840A</sup>, also cause plasmid loss, though not as  
25 robustly. Thus, sgRNA-directed Cas9 DNA cleavage provides a highly efficient way to eliminate *B.*  
26 *burgdorferi* endogenous plasmids that are non-essential in axenic culture.

27

## 28 **INTRODUCTION**

29 Lyme disease, also known as Lyme borreliosis, is the most prevalent vector-borne disease in North  
30 America and Eurasia [1, 2]. It is caused primarily by the spirochete *Borrelia burgdorferi* and the related  
31 *Borrelia afzelii* and *Borrelia garinii* species. The disease presents with various symptoms that can  
32 include fever, malaise, rash, arthritis, neurological dysfunctions, and cardiac manifestations [3]. Humans  
33 are accidental hosts. In nature, *B. burgdorferi* is typically maintained through a transmission cycle

34 between a vertebrate host reservoir (e.g., white footed mice and other small mammals, but also birds)  
35 and an ixodid tick vector [4]. During feeding, *B. burgdorferi*-colonized tick vectors deliver the  
36 spirochetes into vertebrate hosts, where the spirochetes can replicate, disseminate, and often establish  
37 persistent infection.

38

39 Members of the Borreliaceae family contain the most segmented bacterial genomes known to date [5].  
40 For instance, the genome of the *B. burgdorferi* type strain B31 is composed of a linear chromosome and  
41 21 linear and circular plasmids [6, 7]. During growth, the Borreliaceae are polyploid, as each cell carries  
42 multiple copies of both the chromosome and plasmids [8, 9]. The chromosome encodes the vast majority  
43 of essential housekeeping and metabolic functions [6, 10]. In contrast, the plasmids primarily encode  
44 lipoproteins that mediate the spirochetes' interaction with the vertebrate and tick host environments and  
45 help them evade host immune defenses [6, 7, 11-16]. Additionally, each strain hosts several highly  
46 similar plasmid members of the cp32 class, which are prophages [7, 17-20]. In the *B. burgdorferi* type  
47 strain B31, which is the most well studied genetically, only plasmid cp26 has been shown to be required  
48 for growth in axenic culture [21-24]. Several other plasmids are known to be required in the vertebrate  
49 or tick hosts [4, 25, 26]. However, much remains unknown about the roles of *B. burgdorferi* plasmids.  
50 Furthermore, as the number of distinct plasmid types and the genes carried by any given plasmid type  
51 vary significantly among Borreliaceae species and strains [10, 17, 27, 28], strain-to-strain inferences of  
52 plasmid function are not always possible.

53

54 An effective way to investigate plasmid function is to remove it from a given strain. Spontaneous  
55 plasmid loss during extended passaging in axenic culture has been known since the early days of Lyme  
56 disease research [29, 30], but this approach is not specific to a particular plasmid of interest and often

57 results in loss of multiple plasmids [25, 26, 31, 32]. Curing a specific plasmid can be achieved through  
58 transformation of *B. burgdorferi* with a shuttle vector that carries the plasmid maintenance locus of the  
59 endogenous plasmid of interest [33]. The incompatibility that arises between the endogenous plasmid  
60 and the introduced shuttle vector leads to displacement of the endogenous plasmid by the shuttle vector  
61 [33-39]. However, this approach requires knowledge of the plasmid maintenance locus of the targeted  
62 endogenous plasmids.

63  
64 A potentially easier method to eliminate endogenous plasmids from *B. burgdorferi* strains would be to  
65 generate site-specific DNA lesions. In the absence of efficient DNA repair, those lesions might lead to  
66 degradation of the targeted endogenous plasmid. Indeed, in the absence of a recombinational donor  
67 sequence, exogenously induced double-stranded DNA breaks (DSBs) in the chromosome can be lethal  
68 in several bacteria, including *Escherichia coli* [40, 41], streptococci [42], *Clostridium cellulolyticum*  
69 [43], and the spirochete *Leptospira biflexa* [44]. Repair of a site-specific DSB in *Neisseria gonorrhoeae*,  
70 when there are no homologous sequences to provide a template for recombinational repair, occurs at  
71 such low frequencies that less than one cell in ten thousands survives this type of genome lesion [45]. In  
72 contrast, the presence of short (5 to 23 base pairs) homologous sequences flanking an endonuclease-  
73 induced DSB led to RecA-mediated repair in a small fraction of cells [45]. Since most *B. burgdorferi*  
74 plasmids are not needed for growth in axenic culture, induction of DNA lesions in *B. burgdorferi*  
75 plasmids should cause plasmid loss if DNA repair is inefficient.

76  
77 To generate such site-specific lesions, we used the clustered regularly interspaced palindromic repeats  
78 (CRISPR)-Cas9 system derived from *Streptococcus pyogenes* [46, 47]. Cas9 is the endonuclease  
79 component of a type of bacterial innate immunity defense against invading foreign DNA molecules [48].

80 It has two catalytic residues, D10 and H840, each cutting one of the strands of the targeted double  
81 stranded DNA sequence [46]. Cas9 targeting to a specific DNA sequence can be achieved by co-  
82 expression of a short guide RNA molecule, or sgRNA. Base pairing between the Cas9-bound sgRNA  
83 and the target DNA sequence next to a protospacer-adjacent motif (PAM) directs the Cas9 activity to the  
84 genome location specified by the sgRNA [46]. While wild-type Cas9 (Cas9<sup>WT</sup>) generates a DSB in the  
85 target DNA sequence, single active site mutants (Cas9<sup>D10A</sup> and Cas9<sup>H840A</sup>) are nickases that generate  
86 single-stranded DNA breaks (SSBs) [46]. Finally, the double mutant, catalytically dead Cas9<sup>D10A/H840A</sup>,  
87 or dCas9, does not create DNA lesions and thus serves as a negative control. dCas9, however, can  
88 interfere with transcription when targeted to promoters and promoter-proximal coding region [49, 50].  
89 Relying on this transcription-interfering property, a previous report from our laboratory established and  
90 characterized a dCas9-based CRISPR interference (CRISPRi) platform in *B. burgdorferi* [51]. Building  
91 on that work, we report herein the effects of targeting Cas9<sup>WT</sup> and its nickase versions to several *B.*  
92 *burgdorferi* endogenous plasmid loci.

93

## 94 **RESULTS**

### 95 **Expression and targeting of Cas9 activity in *B. burgdorferi***

96 The previous report establishing CRISPRi in *B. burgdorferi* relied in part on all-in-one *E. coli* / *B.*  
97 *burgdorferi* shuttle vectors that carry a constitutive sgRNA expression cassette as well as an isopropyl  $\beta$ -  
98 D-1-thiogalactopyranoside (IPTG)-inducible dCas9 expression cassette [51]. Using these CRISPRi  
99 shuttle vectors or control vectors that lack the sgRNA as background, we generated vectors (Fig. 1) that  
100 express either Cas9<sup>WT</sup>, which cleaves both DNA strands, or nickases Cas9<sup>H840A</sup> and Cas9<sup>D10A</sup>, which  
101 cleave only one DNA strand [46].

102

103 **Figure 1. Schematic depiction of *E. coli/B. burgdorferi* shuttle vectors used in this study.** Left,  
104 all-in-one, Cas9-targeting shuttle vectors carrying a sgRNA expression cassette as well as an IPTG-  
105 inducible Cas9 expression cassette that contains a constitutively expressed *lacI* gene. Right, non-  
106 targeting Cas9 shuttle vectors, which lack the sgRNA cassette. The Cas9 versions used are, from top  
107 to bottom: dCas9, Cas9<sup>D10A</sup>, Cas9<sup>H840A</sup>, and Cas9<sup>WT</sup>. The dCas9 shuttle vectors were previously  
108 described [51]. Presence of the D10A or H840A mutation is indicated by arrowheads. Features are  
109 not drawn to scale. For simplicity, other important features of the shuttle vectors, such as the  
110 antibiotic resistance cassette or the *E. coli* or *B. burgdorferi* origins of replication, are not marked on  
111 the figure.

112  
113 In separate cultures, we targeted Cas9<sup>WT</sup> or its nickase versions to two endogenous *B. burgdorferi*  
114 plasmids, lp25 and lp28-1 (Fig. 2). Plasmid lp25 encodes the nicotinamidase PncA which is essential for  
115 *B. burgdorferi*'s survival in the tick and vertebrate hosts [25, 34, 52-56]. Plasmid lp28-1 carries the *vls*  
116 antigenic variation system, which is composed of the expressed *vlsE* lipoprotein gene and 15 silent *vls*  
117 cassettes, *vls2-vls16* (Fig. 2A), and is needed for the establishment of persistent infection in  
118 immunocompetent vertebrate hosts [11, 57, 58]. For lp28-1, we independently targeted two different  
119 sites in *vlsE*, plus one site in one of the silent *vls* cassettes, *vls11*, and another in the non-*vls* locus *bbf03*  
120 (Fig. 2A). For lp25, we selected genes *bbe10* and *bbe17* and targeted them individually (Fig. 2B). The  
121 sequences of the spacer and the PAM of these sgRNAs are listed in Table 1.

122  
123 **Figure 2. Locations targeted by Cas9 activity in *B. burgdorferi* endogenous plasmids lp28-1 and**  
124 **lp25. A.** Top: schematic depiction of plasmid lp28-1. Marked (but not drawn to scale) are gene  
125 *bbf03* and the *vls* locus, which were targeted by the indicated sgRNAs. The sgRNAs were used one

126 at a time, never in combination. Middle: magnification of the *vls* locus. Shown (but not drawn to  
127 scale) are the expressed *vlsE* lipoprotein gene and the 15 silent *vls* cassettes. Bottom: magnified view  
128 of the *vlsE1* cassette, which contains the variable regions of the expressed *vlsE* lipoprotein, flanked  
129 by two direct repeats (DRs). Variable regions (VRs) 1 through 6 are depicted, as well as the  
130 locations targeted by sgRNA<sub>vlsE1</sub> and sgRNA<sub>vlsE2</sub>. Covalently closed hairpin telomeres are  
131 depicted as ovals flanking both ends of the linear plasmid. **B.** Same as in (A) but for plasmid lp25.  
132 Marked (but not drawn to scale) are genes *bbe10* and *bbe17*, which were independently targeted by  
133 the indicated sgRNAs. **C.** Depiction of part of the *vlsE* gene of strain K2. Shown in gray are  
134 sequences shared with the *vlsE* sequence reported for the parental strain B31. In color are divergent  
135 sequences that likely arose by recombination of the indicated silent cassettes into the expressed  
136 locus. The colors match those used for the silent cassettes in panel A. The *vls8/16* notation signifies  
137 a sequence that could have originated from either the *vls8* or *vls16* silent cassette.

138

| sgRNA ID | Guide RNA spacer sequence (5' to 3') | PAM | <i>B. burgdorferi</i> target plasmid |
|----------|--------------------------------------|-----|--------------------------------------|
| bbe10    | AGGGGGAAGACAATTTACTT                 | TGG | lp25                                 |
| bbe17    | AATATTCCTTCAGGGTAAGC                 | AGG | lp25                                 |
| vlsE1    | GGATGGAGAGAAGCCTGAGG                 | AGG | lp28-1                               |
| vlsE2    | GCTACAGGGGAGAATAATAA                 | AGG | lp28-1                               |
| vls11    | GCTGTTAGTGCTGGTTAGTG                 | TGG | lp28-1                               |
| bbf03    | AGAGTTTCTACGATTGAGTA                 | TGG | lp28-1                               |

139

140 For these experiments, we used strain B31-A3-68  $\Delta bbe02::P_{flgB}$ -*aphI*, also known as K2, a  
141 transformable, clonal, infectious derivative of the type strain B31 [59]. A mouse passage occurred  
142 during the derivation of strain K2 from the parental, sequenced B31 strain [31, 59]. During that mouse  
143 passage, gene conversion events likely changed the *vlsE* sequence. We therefore sequenced the entire *vls*  
144 locus of strain K2 using long read single-molecule, real-time (SMRT) sequencing [60] to obtain an  
145 accurate sequence encompassing the expressed *vlsE* gene and the repetitive silent *vls* cassettes. We

146 found that the sequence of the silent *vls* cassette region was identical to the *B. burgdorferi* B31 reference  
147 sequence (GenBank accession number AE000794.2) [6]. In contrast, we found that the sequence of the  
148 *vlsE* gene of strain K2 had indeed diverged from the parental B31 *vlsE*, as expected. We detected five  
149 clusters of changes that could be attributed to segmental gene conversion events in which the original  
150 sequence was replaced by segments copied from the *vls2-vls16* silent cassette sequences (Fig. 2C).  
151 Based on the alignment of the K2 *vlsE* sequence with the silent *vls2-16* cassette sequences, we designed  
152 two sgRNAs, sgRNA<sub>vlsE1</sub> and sgRNA<sub>vlsE2</sub>, to maximize on-target (*vlsE*) and minimize off-target (the  
153 rest of the genome including *vls2-16*) binding potential (Fig. 2C and Table 1). We were unable to  
154 generate a shuttle vector carrying both *cas9<sup>wt</sup>* and sgRNA<sub>vlsE2</sub>, possibly due to toxicity of DSBs  
155 associated with off-target Cas9<sup>WT</sup> activity in *E. coli*. We did, however, generate shuttle vectors carrying  
156 genes encoding dCas9, Cas9<sup>D10A</sup>, or Cas9<sup>H840A</sup>, in combination with sgRNA<sub>vlsE2</sub>. The shuttle vectors  
157 containing these constructs are listed in Table 2.  
158



159

| Table 2. <i>E. coli/B. burgdorferi</i> shuttle vectors <sup>a</sup> used in this study |                                |                        |                     |
|----------------------------------------------------------------------------------------|--------------------------------|------------------------|---------------------|
| Shuttle vector name                                                                    | CJW strain number <sup>b</sup> | Selection <sup>c</sup> | Source or Reference |
| i. Shuttle vectors expressing catalytically inactive dCas9                             |                                |                        |                     |
| pBbdCas9S                                                                              |                                | Sm/Sp                  | [51]                |
| pBbdCas9S_arr2                                                                         |                                | Sm/Sp, Rf              | [51]                |
| pBbdCas9S_P <sub>syn</sub> -sgRNA500                                                   |                                | Sm/Sp                  | [51]                |
| pBbdCas9G_arr2                                                                         |                                | Gm, Rf                 | [51]                |
| pBbdCas9S(RBSmut)                                                                      |                                | Sm/Sp                  | [51]                |
| pBbdCas9S(RBSmut)_arr2                                                                 |                                | Sm/Sp, Rf              | [51]                |
| pBbdCas9S(RBSmut)_P <sub>syn</sub> -sgRNA500                                           |                                | Sm/Sp                  | [51]                |
| pBbdCas9S(RBSmut)_P <sub>syn</sub> -sgRNAvlsE1                                         | CJW7267                        | Sm/Sp                  | This study          |
| pBbdCas9S(RBSmut)_P <sub>syn</sub> -sgRNAvlsE2                                         | CJW7268                        | Sm/Sp                  | This study          |
| pBbdCas9S(RBSmut)_P <sub>syn</sub> -sgRNAvls11                                         | CJW7269                        | Sm/Sp                  | This study          |
| pBbdCas9S(RBSmut)_P <sub>syn</sub> -sgRNAbbf03                                         | CJW7282                        | Sm/Sp                  | This study          |
| pBbdCas9S(RBSmut)_P <sub>syn</sub> -sgRNAbbe10                                         | CJW7280                        | Sm/Sp                  | This study          |
| pBbdCas9S(RBSmut)_P <sub>syn</sub> -sgRNAbbe17                                         | CJW7281                        | Sm/Sp                  | This study          |
| ii. Shuttle vectors expressing the nickase Cas9 <sup>D10A</sup>                        |                                |                        |                     |
| pBbCas9 <sup>D10A</sup> S(RBSmut)                                                      | CJW7290                        | Sm/Sp                  | This study          |
| pBbCas9 <sup>D10A</sup> S(RBSmut)_arr2                                                 | CJW7291                        | Sm/Sp, Rf              | This study          |
| pBbCas9 <sup>D10A</sup> S(RBSmut)_P <sub>syn</sub> -sgRNA500                           | CJW7292                        | Sm/Sp                  | This study          |
| pBbCas9 <sup>D10A</sup> S(RBSmut)_P <sub>syn</sub> -sgRNAvlsE1                         | CJW7293                        | Sm/Sp                  | This study          |
| pBbCas9 <sup>D10A</sup> S(RBSmut)_P <sub>syn</sub> -sgRNAvlsE2                         | CJW7294                        | Sm/Sp                  | This study          |
| pBbCas9 <sup>D10A</sup> S(RBSmut)_P <sub>syn</sub> -sgRNAvls11                         | CJW7295                        | Sm/Sp                  | This study          |
| pBbCas9 <sup>D10A</sup> S(RBSmut)_P <sub>syn</sub> -sgRNAbbf03                         | CJW7298                        | Sm/Sp                  | This study          |
| pBbCas9 <sup>D10A</sup> S(RBSmut)_P <sub>syn</sub> -sgRNAbbe10                         | CJW7296                        | Sm/Sp                  | This study          |
| pBbCas9 <sup>D10A</sup> S(RBSmut)_P <sub>syn</sub> -sgRNAbbe17                         | CJW7297                        | Sm/Sp                  | This study          |
| iii. Shuttle vectors expressing the nickase Cas9 <sup>H840A</sup>                      |                                |                        |                     |
| pBbCas9 <sup>H840A</sup> S                                                             | CJW7108                        | Sm/Sp                  | This study          |
| pBbCas9 <sup>H840A</sup> S_arr2                                                        | CJW7109                        | Sm/Sp, Rf              | This study          |
| pBbCas9 <sup>H840A</sup> S_P <sub>syn</sub> -sgRNA500                                  | CJW7110                        | Sm/Sp                  | This study          |
| pBbCas9 <sup>H840A</sup> S_P <sub>syn</sub> -sgRNAvlsE1                                | CJW7128                        | Sm/Sp                  | This study          |
| pBbCas9 <sup>H840A</sup> S_P <sub>syn</sub> -sgRNAvlsE2                                | CJW7129                        | Sm/Sp                  | This study          |
| pBbCas9 <sup>H840A</sup> S_P <sub>syn</sub> -sgRNAvls11                                | CJW7246                        | Sm/Sp                  | This study          |
| pBbCas9 <sup>H840A</sup> S_P <sub>syn</sub> -sgRNAbbf03                                | CJW7249                        | Sm/Sp                  | This study          |
| pBbCas9 <sup>H840A</sup> S_P <sub>syn</sub> -sgRNAbbe10                                | CJW7247                        | Sm/Sp                  | This study          |
| pBbCas9 <sup>H840A</sup> S_P <sub>syn</sub> -sgRNAbbe17                                | CJW7248                        | Sm/Sp                  | This study          |
| pBbCas9 <sup>H840A</sup> S(RBSmut)                                                     | CJW7155                        | Sm/Sp                  | This study          |
| pBbCas9 <sup>H840A</sup> S(RBSmut)_arr2                                                | CJW7166                        | Sm/Sp, Rf              | This study          |
| pBbCas9 <sup>H840A</sup> S(RBSmut)_P <sub>syn</sub> -sgRNA500                          | CJW7157                        | Sm/Sp                  | This study          |
| pBbCas9 <sup>H840A</sup> S(RBSmut)_P <sub>syn</sub> -sgRNAvlsE1                        | CJW7158                        | Sm/Sp                  | This study          |
| pBbCas9 <sup>H840A</sup> S(RBSmut)_P <sub>syn</sub> -sgRNAvlsE2                        | CJW7159                        | Sm/Sp                  | This study          |
| pBbCas9 <sup>H840A</sup> S(RBSmut)_P <sub>syn</sub> -sgRNAvls11                        | CJW7250                        | Sm/Sp                  | This study          |
| pBbCas9 <sup>H840A</sup> S(RBSmut)_P <sub>syn</sub> -sgRNAbbf03                        | CJW7253                        | Sm/Sp                  | This study          |
| pBbCas9 <sup>H840A</sup> S(RBSmut)_P <sub>syn</sub> -sgRNAbbe10                        | CJW7251                        | Sm/Sp                  | This study          |
| pBbCas9 <sup>H840A</sup> S(RBSmut)_P <sub>syn</sub> -sgRNAbbe17                        | CJW7252                        | Sm/Sp                  | This study          |
| pBbCas9 <sup>H840A</sup> S(-10TC)                                                      | CJW7160                        | Sm/Sp                  | This study          |

|                                                                                                                                                                                                                                                                                                                                                                                                                                                                                                                                                                                                                                                                                                                                                                                                                                                                                                                                                                                                              |         |           |            |
|--------------------------------------------------------------------------------------------------------------------------------------------------------------------------------------------------------------------------------------------------------------------------------------------------------------------------------------------------------------------------------------------------------------------------------------------------------------------------------------------------------------------------------------------------------------------------------------------------------------------------------------------------------------------------------------------------------------------------------------------------------------------------------------------------------------------------------------------------------------------------------------------------------------------------------------------------------------------------------------------------------------|---------|-----------|------------|
| pBbCas9 <sup>H840A</sup> S(-10TC)_arr2                                                                                                                                                                                                                                                                                                                                                                                                                                                                                                                                                                                                                                                                                                                                                                                                                                                                                                                                                                       | CJW7161 | Sm/Sp, Rf | This study |
| pBbCas9 <sup>H840A</sup> S(-10TC)_P <sub>syn</sub> -sgRNA500                                                                                                                                                                                                                                                                                                                                                                                                                                                                                                                                                                                                                                                                                                                                                                                                                                                                                                                                                 | CJW7162 | Sm/Sp     | This study |
| pBbCas9 <sup>H840A</sup> S(-10TC)_P <sub>syn</sub> -sgRNAvlsE1                                                                                                                                                                                                                                                                                                                                                                                                                                                                                                                                                                                                                                                                                                                                                                                                                                                                                                                                               | CJW7163 | Sm/Sp     | This study |
| pBbCas9 <sup>H840A</sup> S(-10TC)_P <sub>syn</sub> -sgRNAvlsE2                                                                                                                                                                                                                                                                                                                                                                                                                                                                                                                                                                                                                                                                                                                                                                                                                                                                                                                                               | CJW7164 | Sm/Sp     | This study |
| pBbCas9 <sup>H840A</sup> S(-10TC)_P <sub>syn</sub> -sgRNAvls11                                                                                                                                                                                                                                                                                                                                                                                                                                                                                                                                                                                                                                                                                                                                                                                                                                                                                                                                               | CJW7254 | Sm/Sp     | This study |
| pBbCas9 <sup>H840A</sup> S(-10TC)_P <sub>syn</sub> -sgRNAbbe17                                                                                                                                                                                                                                                                                                                                                                                                                                                                                                                                                                                                                                                                                                                                                                                                                                                                                                                                               | CJW7255 | Sm/Sp     | This study |
| iv. Shuttle vectors expressing wild-type Cas9                                                                                                                                                                                                                                                                                                                                                                                                                                                                                                                                                                                                                                                                                                                                                                                                                                                                                                                                                                |         |           |            |
| pBbCas9S(RBSmut)                                                                                                                                                                                                                                                                                                                                                                                                                                                                                                                                                                                                                                                                                                                                                                                                                                                                                                                                                                                             | CJW7283 | Sm/Sp     | This study |
| pBbCas9S(RBSmut)_arr2                                                                                                                                                                                                                                                                                                                                                                                                                                                                                                                                                                                                                                                                                                                                                                                                                                                                                                                                                                                        | CJW7284 | Sm/Sp, Rf | This study |
| pBbCas9S(RBSmut)_P <sub>syn</sub> -sgRNA500                                                                                                                                                                                                                                                                                                                                                                                                                                                                                                                                                                                                                                                                                                                                                                                                                                                                                                                                                                  | CJW7285 | Sm/Sp     | This study |
| pBbCas9S(RBSmut)_P <sub>syn</sub> -sgRNAvlsE1                                                                                                                                                                                                                                                                                                                                                                                                                                                                                                                                                                                                                                                                                                                                                                                                                                                                                                                                                                | CJW7286 | Sm/Sp     | This study |
| pBbCas9S(RBSmut)_P <sub>syn</sub> -sgRNAvls11                                                                                                                                                                                                                                                                                                                                                                                                                                                                                                                                                                                                                                                                                                                                                                                                                                                                                                                                                                | CJW7278 | Sm/Sp     | This study |
| pBbCas9S(RBSmut)_P <sub>syn</sub> -sgRNAbbf03                                                                                                                                                                                                                                                                                                                                                                                                                                                                                                                                                                                                                                                                                                                                                                                                                                                                                                                                                                | CJW7279 | Sm/Sp     | This study |
| pBbCas9S(RBSmut)_P <sub>syn</sub> -sgRNAbbe10                                                                                                                                                                                                                                                                                                                                                                                                                                                                                                                                                                                                                                                                                                                                                                                                                                                                                                                                                                | CJW7288 | Sm/Sp     | This study |
| pBbCas9S(RBSmut)_P <sub>syn</sub> -sgRNAbbe17                                                                                                                                                                                                                                                                                                                                                                                                                                                                                                                                                                                                                                                                                                                                                                                                                                                                                                                                                                | CJW7289 | Sm/Sp     | This study |
| <sup>a</sup> Naming of the <i>E. coli/B. burgdorferi</i> shuttle vectors follows the nomenclature established and described in detail in [51]. Of note, Cas9 variant expression is driven either by the IPTG-inducible P <sub>pQE30</sub> promoter or by its mutant versions in which the -10 region of the promoter (-10TC) or the ribosome binding site (RBSmut) were mutated to reduce basal Cas9 expression; <sup>b</sup> When requesting a plasmid from the Jacobs-Wagner lab, please include the CJW strain number alongside the plasmid name. For constructs previously published in [51], a CJW strain number is not provided, as the plasmids are available from Addgene. Please refer to the original publication for the Addgene catalog numbers; <sup>c</sup> Sm/Sp, streptomycin/spectinomycin resistance conferred by the <i>aadA</i> gene; <sup>d</sup> Rf, rifampin resistance conferred by the <i>arr2</i> gene; <sup>e</sup> Gm, gentamicin resistance conferred by the <i>aacC1</i> gene. |         |           |            |

160

## 161 Targeting Cas9 activity to endogenous *B. burgdorferi* plasmids causes plasmid loss

162 We electroporated the shuttle vectors described above into strain K2. As controls, we used shuttle  
 163 vectors lacking the sgRNA cassette and shuttle vectors expressing dCas9 rather than Cas9<sup>WT</sup> (Table 2).  
 164 For each construct, we plated the electroporated cells after about three generations, grew a small number  
 165 of the resulting clones, and determined their endogenous plasmid content by multiplex PCR, as  
 166 previously described [61]. We found that all clones that had received a shuttle vector expressing Cas9<sup>WT</sup>  
 167 and the *vlsE*-targeting sgRNAvlsE1 had lost the *vlsE*-carrying plasmid lp28-1 (Table 3, Fig. 3). This was  
 168 not due to widespread loss of lp28-1 from the parental strain, as clones obtained from electroporation of  
 169 a shuttle vector expressing Cas9<sup>WT</sup> but no sgRNA retained their lp28-1 plasmid (Table 3, Fig. 3).  
 170 Similarly, electroporation of shuttle vectors encoding catalytically inactive dCas9, either alone or  
 171 alongside sgRNAvlsE1 or sgRNAvlsE2, did not cause widespread lp28-1 loss (Table 3). The loss of

172 lp28-1 occurred in spite of the presence of the adjacent homologous *vls2* – *vls16* sequences that are used  
173 as donors for the generation of variant *vlsE* sequences during mammalian infection. There was also  
174 extensive plasmid loss when we targeted Cas9<sup>WT</sup> to two other sites on lp28-1: the silent cassette *vls11* or  
175 to the non-*vls* gene *bbf03* (Table 3, Fig. 3). Therefore, Cas9<sup>WT</sup>-mediated lp28-1 loss requires both Cas9  
176 activity and targeting of this activity to the lp28-1 plasmid by a sgRNA regardless of where the DNA cut  
177 occurs. This effect was not limited to lp28-1, as targeting Cas9<sup>WT</sup> to genes *bbe10* or *bbe17* on  
178 endogenous plasmid lp25 resulted in loss of plasmid lp25 but not of lp28-1 (Table 3). All other  
179 endogenous *B. burgdorferi* plasmids were retained in almost all clones analyzed (Table 3). As with  
180 lp28-1, the loss of lp25 was dependent on Cas9 activity and the expression of a lp25-specific sgRNA, as  
181 expressing Cas9<sup>WT</sup> alone, or targeting dCas9 to lp25 did not affect lp25 retention (Table 3). We note that  
182 the transformants were selected and grown in the absence of Cas9 expression by IPTG induction.  
183 Presumably, the previously documented low but detectable basal expression of Cas9 from this system  
184 [51] generates enough activity to induce plasmid loss.

185  
186 **Figure 3. Targeting Cas9 activity to lp28-1 causes the loss of this plasmid from the cell**  
187 **population.** Cells of *B. burgdorferi* strain K2 were electroporated with shuttle vectors expressing  
188 Cas9<sup>WT</sup> and the indicated sgRNAs. Four clones obtained from each transformation were analyzed by  
189 multiplex PCR for the presence or absence of *B. burgdorferi* endogenous plasmids. The PCR  
190 reactions were grouped into six sets. The endogenous plasmids corresponding to each of the bands  
191 are listed on the right. Signal intensity was scaled to ensure that all positive bands could be seen. As  
192 a result, the intensities of some bands are saturated.

193

194

| Table 3. Endogenous plasmid retention in individual <i>B. burgdorferi</i> clones after electroporation of Cas9/sgRNA vectors, as detected by multiplex PCR <sup>a</sup> |                                                   |       |                 |                                                                                     |                                    |
|-------------------------------------------------------------------------------------------------------------------------------------------------------------------------|---------------------------------------------------|-------|-----------------|-------------------------------------------------------------------------------------|------------------------------------|
| Cas9 version                                                                                                                                                            | Endogenous <i>B. burgdorferi</i> plasmid targeted | sgRNA | Clones analyzed | Plasmid retention (detected count / expected count for full retention) <sup>b</sup> |                                    |
|                                                                                                                                                                         |                                                   |       |                 | Targeted plasmid (lp28-1 or lp25)                                                   | All other tested plasmids combined |
| Cas9 <sup>WT</sup>                                                                                                                                                      | None                                              | None  | 4               | N/A <sup>c</sup>                                                                    | 72/72                              |
|                                                                                                                                                                         | lp28-1                                            | vlsE1 | 4               | 0/4                                                                                 | 68/68                              |
|                                                                                                                                                                         |                                                   | vls11 | 4               | 0/4                                                                                 | 68/68                              |
|                                                                                                                                                                         |                                                   | bbf03 | 4               | 0/4                                                                                 | 68/68                              |
|                                                                                                                                                                         | lp25                                              | bbe10 | 4               | 0/4                                                                                 | 67/68                              |
|                                                                                                                                                                         |                                                   | bbe17 | 4               | 0/4                                                                                 | 68/68                              |
| dCas9                                                                                                                                                                   | None                                              | None  | 4               | N/A                                                                                 | 72/72                              |
|                                                                                                                                                                         | lp28-1                                            | vlsE1 | 4               | 4/4                                                                                 | 68/68                              |
|                                                                                                                                                                         |                                                   | vlsE2 | 4               | 3/4                                                                                 | 67/68                              |
|                                                                                                                                                                         |                                                   | vls11 | 4               | 4/4                                                                                 | 68/68                              |
|                                                                                                                                                                         |                                                   | bbf03 | 4               | 4/4                                                                                 | 68/68                              |
|                                                                                                                                                                         | lp25                                              | bbe10 | 4               | 4/4                                                                                 | 68/68                              |
|                                                                                                                                                                         |                                                   | bbe17 | 4               | 4/4                                                                                 | 68/68                              |
| Cas9 <sup>D10A</sup>                                                                                                                                                    | None                                              | None  | 4               | N/A                                                                                 | 70/72                              |
|                                                                                                                                                                         | lp28-1                                            | vlsE1 | 4               | 0/4                                                                                 | 68/68                              |
|                                                                                                                                                                         |                                                   | vlsE2 | 4               | 0/4                                                                                 | 68/68                              |
|                                                                                                                                                                         |                                                   | vls11 | 4               | 0/4                                                                                 | 68/68                              |
|                                                                                                                                                                         |                                                   | bbf03 | 4               | 3/4                                                                                 | 68/68                              |
|                                                                                                                                                                         | lp25                                              | bbe10 | 4               | 0/4                                                                                 | 68/68                              |
|                                                                                                                                                                         |                                                   | bbe17 | 4               | 4/4                                                                                 | 68/68                              |
| Cas9 <sup>H840A</sup>                                                                                                                                                   | None                                              | None  | 8               | N/A                                                                                 | 143/144                            |
|                                                                                                                                                                         | lp28-1                                            | vlsE1 | 16              | 0/16                                                                                | 272/272                            |
|                                                                                                                                                                         |                                                   | vlsE2 | 16              | 0/16                                                                                | 272/272                            |
|                                                                                                                                                                         |                                                   | vls11 | 4               | 0/4                                                                                 | 68/68                              |
|                                                                                                                                                                         |                                                   | bbf03 | 4               | 2/4                                                                                 | 68/68                              |
|                                                                                                                                                                         | lp25                                              | bbe10 | 4               | 0/4                                                                                 | 68/68                              |
|                                                                                                                                                                         |                                                   | bbe17 | 4               | 4/4                                                                                 | 68/68                              |

<sup>a</sup>Data was aggregated based on the Cas9 version and the sgRNA expressed by the shuttle vector. Transformed strains carrying the same sgRNA but expressing different basal levels of the Cas9 variant were analyzed together. Plasmid detection was achieved by multiplex PCR [61]; <sup>b</sup>Data compares the number of endogenous plasmids detected in the analyzed clones with the expected number of endogenous plasmids if they had all been retained. All plasmid counts are combined for the non-targeted plasmids. A total of 18 non-targeted plasmids were assayed for each clone obtained by transformation with a shuttle vector lacking a sgRNA. A total of 17 non-targeted plasmids were assayed for each clone obtained by transformation with a shuttle vector expressing a sgRNA; <sup>c</sup>N/A, not applicable.

195

196 Performing multiplex PCR assays on individual clones is relatively labor-intensive. Additionally, if  
197 Cas9<sup>WT</sup>-mediated plasmid loss is not 100% effective, the fraction of cells that still retain the targeted  
198 plasmid might be below detection. To avoid these drawbacks, we quantified endogenous plasmid  
199 retention by plating electroporated *B. burgdorferi* populations under differential antibiotic selection. In  
200 these plating assays, we used strain K2, in which retention of plasmid lp25 allows colony formation in  
201 the presence of kanamycin. Additionally, we derived strain CJW\_Bb471 from strain K2 by inserting a  
202 gentamicin resistance cassette in its lp28-1 plasmid. This genetic modification does not interfere with *B.*  
203 *burgdorferi*'s ability to infect mice or be acquired by ticks [34]. Plating CJW\_Bb471 transformants in  
204 the presence of kanamycin assays retention of lp25, while plating in the presence of gentamicin  
205 examines retention of lp28-1. In both cases, acquisition of streptomycin resistance indicates successful  
206 delivery of the Cas9-expressing shuttle vector. The number of streptomycin-resistant transformants  
207 detected in these experiments varied significantly both within an experiment and between experiments  
208 (Fig. S1A), as did transformation frequencies, as measured in one of the experiments (Fig. S1B). Despite  
209 these limitations, we could detect the following trends (see Tables 4 and 5 and Fig. 4). First, targeting  
210 Cas9<sup>WT</sup> to either lp25 or lp28-1 did not result in the recovery of transformants retaining the targeted  
211 plasmid. Second, targeted dCas9 did not destabilize the targeted plasmids. Third, all Cas9 versions failed  
212 to destabilize lp25 or lp28-1 in the absence of a targeting sgRNA. Based on the number of clones that  
213 received the Cas9-expressing shuttle vector in each of the electroporations, we calculated the lowest  
214 frequency at which we could detect clones retaining the targeted endogenous plasmids (Fig. S1). These  
215 experimental limits of detection of plasmid retention within the transformed cell populations also varied  
216 significantly from electroporation to electroporation. The lowest limit of detection was around 10<sup>-3</sup> (Fig.  
217 S1C). This value indicates that DSB repair mechanisms that occur less frequently than in one cell out of  
218 1,000 cells could not be detected in our assay.

219 **Figure 4. Summary of the *B. burgdorferi* transformation results.** Graph compiling the plasmid  
220 retention values measured in experiment 3 described in Tables 4 and 5. Plasmid retention was  
221 calculated by dividing the concentration of cells that received the Cas9/sgRNA-expressing shuttle  
222 vector and retained the targeted plasmid by the concentration of cells that received the shuttle vector  
223 for any given electroporation. Experimental samples were grouped as follows. The “No sgRNA”  
224 group combines transformations of shuttle vectors encoding each of the four Cas9 versions (Cas9<sup>WT</sup>,  
225 Cas9<sup>D10A</sup>, Cas9<sup>H840A</sup>, and dCas9) but no sgRNA. These transformations were plated under either  
226 kanamycin or gentamicin selection to assess retention of lp25 or lp28-1, respectively. All other  
227 transformations are grouped based on the version of Cas9 expressed from the shuttle vector and  
228 combine lp28-1 and lp25-targeting constructs.  
229

230

| Table 4. Linear plasmid 25 (lp25) retention in <i>B. burgdorferi</i> following Cas9 targeting, as detected by plating. |                       |       |                                                              |                                             |
|------------------------------------------------------------------------------------------------------------------------|-----------------------|-------|--------------------------------------------------------------|---------------------------------------------|
| Host strain (marked endogenous plasmid)                                                                                | Cas9 version          | sgRNA | Transformants detected by plating (CFU/mL) <sup>a</sup>      |                                             |
|                                                                                                                        |                       |       | CFU/mL (selection for shuttle vector and endogenous plasmid) | CFU/mL (selection for shuttle vector alone) |
| K2 (lp25)<br>Experiment 1                                                                                              | Cas9 <sup>WT</sup>    | bbe10 | 0                                                            | 910                                         |
|                                                                                                                        |                       | bbe17 | 0                                                            | 500                                         |
|                                                                                                                        | dCas9                 | bbe10 | 610                                                          | 760                                         |
|                                                                                                                        |                       | bbe17 | 530                                                          | 450                                         |
|                                                                                                                        | Cas9 <sup>D10A</sup>  | bbe10 | 118                                                          | 810                                         |
|                                                                                                                        |                       | bbe17 | 370                                                          | 530                                         |
|                                                                                                                        | Cas9 <sup>H840A</sup> | bbe10 | 310                                                          | 770                                         |
|                                                                                                                        |                       | bbe17 | 520                                                          | 430                                         |
| CJW_Bb471 (lp25)<br>Experiment 3 <sup>b</sup>                                                                          | Cas9 <sup>WT</sup>    | None  | 10                                                           | 6.9                                         |
|                                                                                                                        |                       | bbe10 | 0                                                            | 12.3                                        |
|                                                                                                                        |                       | bbe17 | 0                                                            | 17.7                                        |
|                                                                                                                        | dCas9                 | None  | 22.3                                                         | 37.7                                        |
|                                                                                                                        |                       | bbe10 | 145                                                          | 127.5                                       |
|                                                                                                                        |                       | bbe17 | 102.5                                                        | 67.5                                        |
|                                                                                                                        | Cas9 <sup>D10A</sup>  | None  | 82.5                                                         | 107.5                                       |
|                                                                                                                        |                       | bbe17 | 202.5                                                        | 160                                         |
|                                                                                                                        | Cas9 <sup>H840A</sup> | None  | 47.7                                                         | 34.6                                        |
|                                                                                                                        |                       | bbe10 | 0                                                            | 1.5                                         |
| bbe17                                                                                                                  |                       | 1360  | 1380                                                         |                                             |

<sup>a</sup>Different volumes of transformant cultures were plated under streptomycin selection (which selects for the shuttle vector), or streptomycin + kanamycin selection (which selects for lp25). Colonies were counted after 2-3 weeks and the resulting count was used to calculate the concentration of selectable cells in the parental population of transformants, expressed as colony forming units (CFU) per mL; <sup>b</sup>Retention of both lp25 and lp28-1 was assayed in experiment 3 following electroporation of the indicated constructs. For this reason, results from this experiment are presented in both Tables 4 and 5.

231

232

| Table 5. Linear plasmid 28-1 (lp28-1) retention in <i>B. burgdorferi</i> following Cas9 targeting, as detected by plating. |                                                 |                    |                                                              |                                             |
|----------------------------------------------------------------------------------------------------------------------------|-------------------------------------------------|--------------------|--------------------------------------------------------------|---------------------------------------------|
| Host strain (marked endogenous plasmid)                                                                                    | Cas9 version                                    | sgRNA              | Transformants detected by plating (CFU/mL) <sup>a</sup>      |                                             |
|                                                                                                                            |                                                 |                    | CFU/mL (selection for shuttle vector and endogenous plasmid) | CFU/mL (selection for shuttle vector alone) |
| CJW_Bb471 (lp28-1)<br>Experiment 2                                                                                         | Cas9 <sup>WT</sup>                              | None               | 6.9                                                          | 16.2                                        |
|                                                                                                                            |                                                 | vlsE1              | 0                                                            | 5.4                                         |
|                                                                                                                            | dCas9                                           | None               | 2.3                                                          | 4.6                                         |
|                                                                                                                            |                                                 | vlsE1              | 6.9                                                          | 4.6                                         |
|                                                                                                                            |                                                 | vlsE2              | 3.1                                                          | 9.2                                         |
|                                                                                                                            | Cas9 <sup>D10A</sup>                            | None               | 2.3                                                          | 1.5                                         |
|                                                                                                                            |                                                 | vlsE1              | 1.5                                                          | 5.4                                         |
|                                                                                                                            |                                                 | vlsE2              | 3.1                                                          | 4.6                                         |
|                                                                                                                            | Cas9 <sup>H840A</sup>                           | None               | 0.8                                                          | 3.8                                         |
|                                                                                                                            |                                                 | vlsE1              | 0                                                            | 14.6                                        |
|                                                                                                                            |                                                 | vlsE2              | 0                                                            | 5.4                                         |
|                                                                                                                            | CJW_Bb471 (lp28-1)<br>Experiment 3 <sup>b</sup> | Cas9 <sup>WT</sup> | None                                                         | 13.8                                        |
| vlsE1                                                                                                                      |                                                 |                    | 0                                                            | 380                                         |
| vls11                                                                                                                      |                                                 |                    | 0                                                            | 16.1                                        |
| bbf03                                                                                                                      |                                                 |                    | 0                                                            | 29.2                                        |
| dCas9                                                                                                                      |                                                 | None               | 46.9                                                         | 37.7                                        |
|                                                                                                                            |                                                 | vlsE1              | 35.4                                                         | 39.2                                        |
|                                                                                                                            |                                                 | vlsE2              | 7.7                                                          | 9.2                                         |
|                                                                                                                            |                                                 | vls11              | 29.2                                                         | 16.1                                        |
|                                                                                                                            |                                                 | bbf03              | 11.5                                                         | 5.4                                         |
| Cas9 <sup>D10A</sup>                                                                                                       |                                                 | None               | 95                                                           | 107.5                                       |
|                                                                                                                            |                                                 | vlsE2              | 0                                                            | 7.7                                         |
|                                                                                                                            |                                                 | vls11              | 0                                                            | 0.8                                         |
|                                                                                                                            |                                                 | bbf03              | 3.1                                                          | 2.3                                         |
| Cas9 <sup>H840A</sup>                                                                                                      |                                                 | None               | 51.5                                                         | 34.6                                        |
|                                                                                                                            |                                                 | vlsE1              | 64.6                                                         | 700                                         |
|                                                                                                                            | vlsE2                                           | 58.5               | 270                                                          |                                             |
|                                                                                                                            | vls11                                           | 11.5               | 35                                                           |                                             |
|                                                                                                                            | bbf03                                           | 2.3                | 0.8                                                          |                                             |

<sup>a</sup>Different volumes of transformant cultures were plated under streptomycin selection (which selects for the shuttle vector), or streptomycin + gentamicin (which selects for lp28-1). Colonies were counted and the resulting count was used to calculate the concentration of selectable cells in the parental population of transformants, expressed as colony forming units (CFU) per mL; <sup>b</sup>Retention of both lp25 and lp28-1 was assayed in experiment 3 following electroporation of the indicated constructs. For this reason, results from this experiment are presented in both Tables 4 and 5.

233



## 234 **Destabilizing effects of Cas9 nickases on *B. burgdorferi* endogenous plasmids**

235 While Cas9<sup>WT</sup> robustly and specifically induced plasmid loss when targeted to lp25 or lp28-1 (Tables 3-  
236 5, Fig. 4), the nickases Cas9<sup>D10A</sup> and Cas9<sup>H840A</sup> exhibited more heterogeneous behaviors. When  
237 analyzing by multiplex PCR the clones isolated in the absence of selection for the targeted plasmid, we  
238 found that targeting the nickases to the *vls* region of lp28-1 or the *bbe10* locus of lp25 was more  
239 efficient at causing plasmid loss than targeting the nickases to the *bbf03* locus of lp28-1 or the *bbe17*  
240 locus of lp25 (Table 3). We noticed a similar trend when we selected the transformants for the targeted  
241 plasmid (Tables 4 and 5, Fig. 4). These differences could be due to distinct targeting efficiencies by the  
242 sgRNAs or could reflect varied efficiencies in repairing SSBs induced at the sgRNA-targeted location.

243

## 244 **DISCUSSION**

245 We previously showed that targeting dCas9 to selected *B. burgdorferi* genes causes specific and  
246 efficient downregulation of gene expression, allowing for relatively easy and fast strain generation and  
247 phenotypic investigation [51]. In this study, we show that targeting Cas9<sup>WT</sup> or its nickase variants to  
248 plasmid-encoded loci results in plasmid loss, though to a varying degree (Tables 3-5 and Fig. 4). In the  
249 case of Cas9<sup>WT</sup>, plasmid loss was very efficient, indicating that repair of double-stranded DNA breaks  
250 generated in this manner occurs below the detection limit of our assay, i.e., less than one in 10<sup>3</sup> cells  
251 retained the targeted endogenous plasmid, based on the highest number of transformants recovered after  
252 Cas9 shuttle vector electroporation (Fig. S1A,C). The nickases Cas9<sup>D10A</sup> and Cas9<sup>H840A</sup> also cause  
253 significant plasmid loss. Presumably, a considerable fraction of nicked plasmids undergo degradation  
254 before DNA repair factors can be recruited to the site of the SSBs. Alternatively, repair of DNA lesions  
255 may be less efficient in *B. burgdorferi* compared to other bacteria, as several DNA repair factors (e.g.,  
256 *mutH*, *lexA*, *ruvC*, *sbcB*, *recFOR*, *recX*) are absent from the *B. burgdorferi* genome [6, 62]. When

257 considering the limit of detection of our assay (Fig. S1C), our results suggest that the efficiency of DSB  
258 repairs in *B. burgdorferi* is at least below  $10^{-3}$  even when donor sequences are present as in the case of  
259 *vlsE* and *vlsII*. Further work will be required to gain better insight into the mechanisms employed by *B.*  
260 *burgdorferi* to repair DNA lesions.

261  
262 Importantly, our work shows that targeting Cas9<sup>WT</sup> to an endogenous *B. burgdorferi* plasmid is an easy  
263 and efficient method to displace the plasmid. The Cas9 nickases can also be used to achieve this  
264 outcome, but they are less effective. Our Cas9-based approach provides an alternative to the previously  
265 developed method that displaces endogenous plasmids through introduction of shuttle vectors belonging  
266 to the same plasmid compatibility class [33-39]. Both methods yield clones in which the targeted  
267 endogenous plasmid is replaced by a shuttle vector that carries an antibiotic resistance marker. The  
268 Cas9-based method, however, does not require prior knowledge of the targeted plasmid's replication and  
269 segregation locus [7, 33-39, 63, 64], and involves only an easy cloning step to insert the sgRNA  
270 sequence into the Cas9 shuttle vector. Additionally, as Cas9 activity can be simultaneously targeted to  
271 multiple locations in the genome by co-expression of relevant sgRNAs [50], simultaneous removal of  
272 multiple plasmids from a *B. burgdorferi* strain should be achievable via a single transformation.

273  
274 While the degree of genome segmentation in Borreliaceae is the highest among the known bacteria,  
275 other bacteria have segmented genomes that can include circular and linear chromosomes, chromids,  
276 megaplasmids, as well as smaller plasmids [5]. Plasmids often encode virulence factors or antibiotic  
277 resistance genes and are stably maintained by highly effective plasmid segregation mechanisms that  
278 ensure faithful inheritance by daughter cells over generations [65]. The study of plasmid-encoded  
279 functions in bacteria other than the Lyme disease spirochetes can therefore be facilitated by

280 implementation of a Cas9-mediated plasmid curation protocol. Translation of this approach across  
281 bacterial phyla is likely feasible, as demonstrated by the successful broad implementation of CRISPR-  
282 based methods of gene regulation [66].

283

## 284 **ACKNOWLEDGEMENTS**

285 We thank Dr. Patricia Rosa for sharing strain K2 and plasmid p28-1::flgBp-aacC1, the members of the  
286 Jacobs-Wagner lab for critical reading of the manuscript, and Dr. George Chaconas for valuable  
287 discussions. C.N.T. was supported in part by an American Heart Association postdoctoral fellowship  
288 (award number 18POST33990330). C.J.-W. is a Howard Hughes Medical Institute Investigator. Y.N.  
289 was supported by the Bay Area Lyme Foundation and the Brandeis University Provost's Research Fund.  
290 J.E.H. was supported by NIH grant R35 GM127029. The funders had no role in study design, data  
291 collection, analysis, and interpretation, decision to submit the work for publication, or preparation of the  
292 manuscript.

293

## 294 **AUTHOR CONTRIBUTIONS**

295 C.N.T. performed and analyzed all *B. burgdorferi* experiments except for the next generation  
296 sequencing analyses. Y.N. designed the sgRNAs and performed the sequencing analysis. C.J.-W. and  
297 J.E.H supervised the work. C.N.T and C.J.-W. wrote the paper with input from J.E.H. and Y.N.

298

## 299 **MATERIALS and METHODS**

### 300 ***E. coli* strains and growth conditions**

301 *E. coli* host strain NEB 5-alpha F' *l<sup>q</sup>* (New England Biolabs) was exclusively used to generate, store, and  
302 amplify the *E. coli*/*B. burgdorferi* shuttle vectors listed in Table 2. The resulting strains were grown on

303 LB agar plates or in Super Broth (35 g/L bacto-tryptone, 20 g/L yeast extract, 5 g/L NaCl, and 6 mM  
304 NaOH) liquid medium with shaking at 30°C [67]. Transformation was achieved by heat shock followed  
305 by recovery in SOC medium (New England Biolabs) for 1h at 30°C with shaking. Antibiotic selection  
306 was achieved using spectinomycin at 50 µg/mL or rifampin at 25 µg/mL in liquid culture or 50 µg/mL in  
307 plates.

308

### 309 ***B. burgdorferi* strains and growth conditions**

310 Previously described *B. burgdorferi* strain B31-A3-68- $\Delta bbe02::P_{flgB-aphI}$ , also known as K2, is an  
311 infectious, highly transformable derivative of the type strain B31 [59]. To derive strain CJW\_Bb471  
312 from K2, pseudogene *bbf29* of plasmid lp28-1 was disrupted by insertion of a gentamicin resistance  
313 cassette. Strains K2 and CJW\_Bb471 contain 18 of the 21 endogenous plasmids of parental strain B31;  
314 they both lack endogenous plasmids cp9, lp5, and lp56 [6, 59]. To generate strain CJW\_Bb471, 75 µg of  
315 plasmid p28-1::flgBp-aacC1 [34] were digested with *AgeI*-HF (New England Biolabs), ethanol  
316 precipitated [68], resuspended in 25 µL water, and electroporated into a 100 µL aliquot of K2  
317 electrocompetent cells. Electroporated cells were immediately transferred to 6 mL complete Barbour-  
318 Stoenner-Kelly (BSK)-II medium and allowed to recover overnight. The following day, cells were  
319 plated in semisolid BSK-agarose medium under kanamycin and gentamicin selection. A clone was  
320 grown and confirmed to have correct insertion of the gentamicin resistance cassette into lp28-1 and to  
321 contain all the endogenous plasmids of the parental strain.

322

323 *B. burgdorferi* strains were grown in complete BSK-II medium at 34°C in a humidified 5% CO<sub>2</sub>  
324 incubator [69-71]. BSK-II medium contained 50 g/L Bovine Serum Albumin, Universal Grade  
325 (Millipore), 9.7 g/L CMRL-1066 (US Biological), 5 g/L Neopeptone (Difco), 2 g/L Yeastolate (Difco),

326 6 g/L HEPES (Millipore), 5 g/L glucose (Sigma-Aldrich), 2.2 g/L sodium bicarbonate (Sigma-Aldrich),  
327 0.8 g/L sodium pyruvate (Sigma-Aldrich), 0.7 g/L sodium citrate (Fisher Scientific), 0.4 g/L N-  
328 acetylglucosamine (Sigma-Aldrich), 60 mL/L heat-inactivated rabbit serum (Gibco), and had a pH of  
329 7.6. For plating in semisolid BSK-agarose medium [51], each 10-cm plate was seeded with up to 1 mL  
330 *B. burgdorferi* culture. BSK-agarose plating medium was made by mixing two volumes of 1.7 %  
331 agarose in water, melted and pre-equilibrated at 55°C with three volumes of BSK-1.5 medium, also  
332 briefly (for less than 5 min) pre-equilibrated at 55 °C and containing appropriate amounts of antibiotics.  
333 Then, 25 mL of the BSK-agarose mix was added to each seeded plate, which was then gently swirled  
334 and allowed to solidify for ~30 min at room temperature in a biosafety cabinet. The plates were then  
335 transferred to a humidified 5% CO<sub>2</sub> incubator kept at 34 °C. BSK-1.5 medium contained 69.4 g/L BSA,  
336 12.7 g/L CMRL-1066, 6.9 g/L Neopeptone, 3.5 g/L Yeastolate, 8.3 g/L HEPES, 6.9 g/L glucose, 6.4 g/L  
337 sodium bicarbonate, 1.1 g/L sodium pyruvate, 1.0 g/L sodium citrate, 0.6 g/L N-acetylglucosamine, 40  
338 mL/L heat-inactivated rabbit serum, and had a pH of 7.5. Antibiotics were used at the following  
339 concentrations: streptomycin at 100 µg/mL, gentamicin at 40 µg/mL, and kanamycin at 200 µg/mL [72-  
340 74]. Unless otherwise indicated, *B. burgdorferi* cultures were maintained in exponential growth by  
341 diluting cultures into fresh medium before cultures densities reached ~5 x 10<sup>7</sup> cells/mL. Cell density of  
342 cultures was determined by direct counting under darkfield illumination using disposable  
343 hemocytometers, as previously described [67].

344

#### 345 ***B. burgdorferi* transformation, clone isolation, and characterization**

346 Electrocompetent cells were generated as previously described [75] and stored as single use 50 or 100  
347 µL aliquots at -80°C. For shuttle vector transformations, 30 or 50 µg of plasmid eluted in water were  
348 electroporated (2.5 kV, 25 µF, 200 Ω, 2 mm gap cuvette) into 50 µL aliquots of competent cells.

349 Electroporated cells were immediately transferred to 6 mL BSK-II and allowed to recover overnight.  
350 The next day, 100, 300, and 900  $\mu$ L aliquots of the culture were each plated in semisolid BSK-agarose  
351 under selection. The remaining culture was diluted 6-fold in BSK-II and selected in liquid culture with  
352 appropriate antibiotics. Once transformants were observed as motile spirochetes, the liquid cultures were  
353 plated for clone isolation. Agarose plugs containing individual colonies were used to inoculate 6 mL  
354 BSK-II cultures. After 3 days, 500 to 1000  $\mu$ L of each clonal culture was removed and pelleted at 10,000  
355 x g for 10 min, the cells were resuspended and lysed in 50-100  $\mu$ L water, and the resulting solution was  
356 used to perform multiplex PCR using primer pairs specific for each endogenous plasmid of strain B31  
357 [61] and the DreamTaq Green DNA Polymerase (Thermo Scientific). For genomic DNA extraction, ~14  
358 mL cultures were grown to  $\sim 10^8$  cells/mL and then pelleted at 4,300 x g for 10 min at room temperature  
359 in a Beckman Coulter X-14R centrifuge equipped with a swinging bucket rotor. The media was removed  
360 and the pellet was processed for DNA extraction using QIAGEN's DNeasy Blood & Tissue Kit protocol  
361 for Gram-negative bacteria. Final elution was carried out in 10 mM Tris-HCl, 0.1 mM EDTA, pH 9.0.

362

### 363 **Generation of *E. coli*/*B. burgdorferi* shuttle vectors for Cas9 and sgRNA expression**

364 Table 2 lists the *E. coli*/*B. burgdorferi* shuttle vectors used or generated in this study. They were based  
365 on the previously described *B. burgdorferi* CRISPR interference platform [51]. The shuttle vectors  
366 express one of the following Cas9 versions: wild-type Cas9, the nickases Cas9<sup>D10A</sup> or Cas9<sup>H840A</sup>, or the  
367 catalytically inactive dCas9 that carries both the D10A and H840A mutations. To revert the D10A  
368 mutation, site-directed mutagenesis was performed on appropriate template plasmids using Agilent's  
369 Quick Change Lightning Site-Directed Mutagenesis kit and primers NT651 and NT652. To revert the  
370 H840A mutation, site-directed mutagenesis was performed on appropriate template plasmids using  
371 primers NT749 and NT750. To generate plasmids with decreased basal expression of Cas9 proteins [51],

372 site-directed mutagenesis was performed on appropriate plasmid templates using primers NT669 and  
 373 NT670, which generated a weakened ribosomal binding site (“RBSmut” constructs), or primers NT677  
 374 and NT678, which introduced a mutation in the -10 region of the Cas9 promoter (“-10TC” constructs).  
 375 Expression cassettes for the sgRNAs were moved among plasmids using restriction endonucleases *AscI*  
 376 and *EagI*. To generate sgRNA expression cassettes, *SapI*-digested *Psyn*-sgRNA500-containing plasmids  
 377 were ligated with annealed primer pairs, as follows: primers NT657 and NT658 generated sgRNA<sub>vlsE1</sub>;  
 378 NT660 and NT661 generated sgRNA<sub>vlsE2</sub>; NT721 and NT722 generated sgRNA<sub>vls11</sub>; NT723 and  
 379 NT724 generated sgRNA<sub>Abbe10</sub>; NT725 and NT726 generated sgRNA<sub>Abbe17</sub>; and NT727 and NT728  
 380 generated sgRNA<sub>Abbf03</sub>. Primer annealing was achieved by mixing 10 µL volumes of each primer at 5  
 381 µM concentration, then cycling the mix five times between 30 s at 95°C and 30 s at 55°C, followed by  
 382 cooling to room temperature. Nucleotide sequences of primers used to generate the *E. coli/B.*  
 383 *burgdorferi* shuttle vectors in this study are given in Table 6.  
 384

| Table 6. Oligonucleotide primers used in this study |                                                               |
|-----------------------------------------------------|---------------------------------------------------------------|
| Name                                                | Sequence (5' to 3')                                           |
| NT651                                               | GGATAAGAAATACTCAATAGGCTTAGATATCGGCACAAATAGCGTCGGATGGG         |
| NT652                                               | CCCATCCGACGCTATTTGTGCCGATATCTAAGCCTATTGAGTATTTCCTATCC         |
| NT657                                               | AGTGCTACAGGGGAGAATAATAA                                       |
| NT658                                               | AACTTATTATTCTCCCCTGTAGC                                       |
| NT660                                               | AGTGGATGGAGAGAAGCCTGAGG                                       |
| NT661                                               | AACCCTCAGGCTTCTCTCCATCC                                       |
| NT669                                               | GATAACAATTCACACAGAATTCATTAAGAAGAGAAATTACATATGGATAAGAAATAC     |
| NT670                                               | GTATTTCTTATCCATATGTAATTTCTCTTCTTTAATGAATTCTGTGTGAAATTGTTATC   |
| NT677                                               | GCTTTGTGAGCGGATAACAATTATAACAGATTCAATTGTGAGCGGATAACAATTTACACAC |
| NT678                                               | GTGTGAAATTGTTATCCGCTCACAATTGAATCTGTTATAATTGTTATCCGCTCACAAAGC  |
| NT721                                               | AGTGCTGTTAGTGCTGGTTAGTG                                       |
| NT722                                               | AACCACTAACCAGCACTAACAGC                                       |
| NT723                                               | AGTAGGGGGAAGACAATTTACTT                                       |
| NT724                                               | AACAAGTAAATTGTCTTCCCCCT                                       |
| NT725                                               | AGTAATATTCTTTCAGGGTAAGC                                       |
| NT726                                               | AACGCTTACCCTGAAAGAATATT                                       |
| NT727                                               | AGTAGAGTTTCTACGATTGAGTA                                       |
| NT728                                               | AACTACTCAATCGTAGAAACTCT                                       |
| NT749                                               | TAATCGTTTAAAGTGATTATGATGTCGATCATATTGTTCCACAAAGTTTCTTAAAGACG   |

|           |                                                            |
|-----------|------------------------------------------------------------|
| NT750     | CGTCTTTAAGGAACTTTGTGGAACAATATGATCGACATCATAATCACTTAAACGATTA |
| YN-LI_266 | GTATTTGTTGTTAAGTAGATAGGAATATTTTCGG                         |
| YN-LI_267 | CGTGTCCATACACTTAATTAATCACTTATTC                            |

### 385 **DNA sequence analysis**

386 To determine the sequence of the *vls* locus of *B. burgdorferi* strain K2, the 10910 base pair region  
387 encompassing *vlsE* and silent cassettes *vls2-vls16* was amplified using Platinum™ SuperFi™ DNA  
388 Polymerase (Thermo Fisher Scientific) and primers YN-LI\_266 and YN-LI\_267 (Table 6) and then  
389 sequenced with a SMRT Cell™ using 10-h data collection (Pacific Biosciences). The resulting reads  
390 were subjected to read-of-insert (ROI) analysis using SMRT Link v6.0.0 (Pacific Biosciences), followed  
391 by multiple sequence alignment, to obtain the final consensus sequence.

392

### 393 **Data and material availability**

394 *B. burgdorferi* strains and *E. coli/B. burgdorferi* shuttle vectors generated in this study (Table 2) are  
395 available upon request from Christine Jacobs-Wagner.

396

### 397 **REFERENCES**

- 398 1. Kugeler KJ, Schwartz AM, Delorey MJ, Mead PS, Hinckley AF. Estimating the frequency of Lyme  
399 disease diagnoses, United States, 2010–2018. *Emerg Infect Dis.* 2021;27(2):616–9. doi:  
400 10.3201/eid2702.202731. PubMed PMID: 33496229; PubMed Central PMCID: PMCPMC7853543.
- 401 2. Mead PS. Epidemiology of Lyme disease. *Infect Dis Clin North Am.* 2015;29(2):187–210. doi:  
402 10.1016/j.idc.2015.02.010. PubMed PMID: 25999219.
- 403 3. Steere AC, Strle F, Wormser GP, Hu LT, Branda JA, Hovius JW, et al. Lyme borreliosis. *Nat Rev*  
404 *Dis Primers.* 2016;2:16090. doi: 10.1038/nrdp.2016.90. PubMed PMID: 27976670.
- 405 4. Radolf JD, Caimano MJ, Stevenson B, Hu LT. Of ticks, mice and men: understanding the dual-host  
406 lifestyle of Lyme disease spirochaetes. *Nat Rev Microbiol.* 2012;10(2):87–99. doi:  
407 10.1038/nrmicro2714. PubMed PMID: 22230951; PubMed Central PMCID: PMC3313462.
- 408 5. diCenzo GC, Finan TM. The divided bacterial genome: structure, function, and evolution. *Microbiol*  
409 *Mol Biol Rev.* 2017;81(3). doi: 10.1128/MMBR.00019-17. PubMed PMID: 28794225; PubMed  
410 Central PMCID: PMCPMC5584315.
- 411 6. Fraser CM, Casjens S, Huang WM, Sutton GG, Clayton R, Lathigra R, et al. Genomic sequence of a  
412 Lyme disease spirochaete, *Borrelia burgdorferi*. *Nature.* 1997;390(6660):580–6. doi: 10.1038/37551.  
413 PubMed PMID: 9403685.
- 414 7. Casjens S, Palmer N, van Vugt R, Huang WM, Stevenson B, Rosa P, et al. A bacterial genome in  
415 flux: the twelve linear and nine circular extrachromosomal DNAs in an infectious isolate of the



- 416 Lyme disease spirochete *Borrelia burgdorferi*. Mol Microbiol. 2000;35(3):490-516. PubMed PMID:  
417 10672174.
- 418 8. Kitten T, Barbour AG. The relapsing fever agent *Borrelia hermsii* has multiple copies of its  
419 chromosome and linear plasmids. Genetics. 1992;132(2):311-24. PubMed PMID: 1427031; PubMed  
420 Central PMCID: PMC1205138.
- 421 9. Takacs CN, Wachter J, Xiang Y, Karaboja X, Ren Z, Scott M, et al. Polyploidy, regular patterning  
422 of genome copies, and unusual control of DNA partitioning in the Lyme disease spirochete. bioRxiv.  
423 2022. doi: 10.1101/2022.07.05.498848.
- 424 10. Schwartz I, Margos G, Casjens SR, Qiu WG, Eggers CH. Multipartite genome of Lyme disease  
425 *Borrelia*: structure, variation and prophages. Curr Issues Mol Biol. 2021;42:409-54. doi:  
426 10.21775/cimb.042.409. PubMed PMID: 33328355.
- 427 11. Chaconas G, Castellanos M, Verhey TB. Changing of the guard: how the Lyme disease spirochete  
428 subverts the host immune response. J Biol Chem. 2020;295(2):301-13. doi:  
429 10.1074/jbc.REV119.008583. PubMed PMID: 31753921; PubMed Central PMCID:  
430 PMC6956529.
- 431 12. Anderson C, Brissette CA. The brilliance of *Borrelia*: mechanisms of host immune evasion by Lyme  
432 disease-causing spirochetes. Pathogens. 2021;10(3). doi: 10.3390/pathogens10030281. PubMed  
433 PMID: 33801255; PubMed Central PMCID: PMC68001052.
- 434 13. Coburn J, Garcia B, Hu LT, Jewett MW, Kraiczy P, Norris SJ, et al. Lyme disease pathogenesis.  
435 Curr Issues Mol Biol. 2021;42:473-518. doi: 10.21775/cimb.042.473. PubMed PMID: 33353871;  
436 PubMed Central PMCID: PMC68046170.
- 437 14. Skare JT, Garcia BL. Complement evasion by Lyme disease spirochetes. Trends Microbiol.  
438 2020;28(11):889-99. doi: 10.1016/j.tim.2020.05.004. PubMed PMID: 32482556; PubMed Central  
439 PMCID: PMC67572514.
- 440 15. Antonara S, Ristow L, Coburn J. Adhesion mechanisms of *Borrelia burgdorferi*. Adv Exp Med Biol.  
441 2011;715:35-49. doi: 10.1007/978-94-007-0940-9\_3. PubMed PMID: 21557056; PubMed Central  
442 PMCID: PMC4521209.
- 443 16. Brissette CA, Gaultney RA. That's my story, and I'm sticking to it--an update on *B. burgdorferi*  
444 adhesins. Front Cell Infect Microbiol. 2014;4:41. doi: 10.3389/fcimb.2014.00041. PubMed PMID:  
445 24772392; PubMed Central PMCID: PMC3982108.
- 446 17. Casjens SR, Gilcrease EB, Vujadinovic M, Mongodin EF, Luft BJ, Schutzer SE, et al. Plasmid  
447 diversity and phylogenetic consistency in the Lyme disease agent *Borrelia burgdorferi*. BMC  
448 Genomics. 2017;18(1):165. doi: 10.1186/s12864-017-3553-5. PubMed PMID: 28201991; PubMed  
449 Central PMCID: PMC5310021.
- 450 18. Brisson D, Zhou W, Jutras BL, Casjens S, Stevenson B. Distribution of cp32 prophages among  
451 Lyme disease-causing spirochetes and natural diversity of their lipoprotein-encoding *erp* loci. Appl  
452 Environ Microbiol. 2013;79(13):4115-28. doi: 10.1128/AEM.00817-13. PubMed PMID: 23624478;  
453 PubMed Central PMCID: PMC3697573.
- 454 19. Eggers CH, Kimmel BJ, Bono JL, Elias AF, Rosa P, Samuels DS. Transduction by phiBB-1, a  
455 bacteriophage of *Borrelia burgdorferi*. J Bacteriol. 2001;183(16):4771-8. doi:  
456 10.1128/JB.183.16.4771-4778.2001. PubMed PMID: 11466280; PubMed Central PMCID:  
457 PMC99531.
- 458 20. Eggers CH, Samuels DS. Molecular evidence for a new bacteriophage of *Borrelia burgdorferi*. J  
459 Bacteriol. 1999;181(23):7308-13. doi: 10.1128/JB.181.23.7308-7313.1999. PubMed PMID:  
460 10572135; PubMed Central PMCID: PMC103694.

- 461 21. Byram R, Stewart PE, Rosa P. The essential nature of the ubiquitous 26-kilobase circular replicon of  
462 *Borrelia burgdorferi*. J Bacteriol. 2004;186(11):3561-9. doi: 10.1128/JB.186.11.3561-3569.2004.  
463 PubMed PMID: 15150244; PubMed Central PMCID: PMC415784.
- 464 22. Sadziene A, Rosa PA, Thompson PA, Hogan DM, Barbour AG. Antibody-resistant mutants of  
465 *Borrelia burgdorferi*: in vitro selection and characterization. J Exp Med. 1992;176(3):799-809. doi:  
466 10.1084/jem.176.3.799. PubMed PMID: 1339462; PubMed Central PMCID: PMCPMC2119346.
- 467 23. Sadziene A, Wilske B, Ferdows MS, Barbour AG. The cryptic *ospC* gene of *Borrelia burgdorferi*  
468 B31 is located on a circular plasmid. Infect Immun. 1993;61(5):2192-5. doi: 10.1128/iai.61.5.2192-  
469 2195.1993. PubMed PMID: 8478109; PubMed Central PMCID: PMCPMC280820.
- 470 24. Casjens S, van Vugt R, Tilly K, Rosa PA, Stevenson B. Homology throughout the multiple 32-  
471 kilobase circular plasmids present in Lyme disease spirochetes. J Bacteriol. 1997;179(1):217-27.  
472 PubMed PMID: 8982001; PubMed Central PMCID: PMC178682.
- 473 25. Purser JE, Norris SJ. Correlation between plasmid content and infectivity in *Borrelia burgdorferi*.  
474 Proc Natl Acad Sci USA. 2000;97(25):13865-70. doi: 10.1073/pnas.97.25.13865. PubMed PMID:  
475 11106398; PubMed Central PMCID: PMC17667.
- 476 26. Xu Y, Kodner C, Coleman L, Johnson RC. Correlation of plasmids with infectivity of *Borrelia*  
477 *burgdorferi* sensu stricto type strain B31. Infect Immun. 1996;64(9):3870-6. doi:  
478 10.1128/iai.64.9.3870-3876.1996. PubMed PMID: 8751941; PubMed Central PMCID:  
479 PMCPMC174305.
- 480 27. Casjens SR, Di L, Akther S, Mongodin EF, Luft BJ, Schutzer SE, et al. Primordial origin and  
481 diversification of plasmids in Lyme disease agent bacteria. BMC Genomics. 2018;19(1):218. doi:  
482 10.1186/s12864-018-4597-x. PubMed PMID: 29580205; PubMed Central PMCID:  
483 PMCPMC5870499.
- 484 28. Kneubehl AR, Krishnavajhala A, Leal SM, Replogle AJ, Kingry LC, Bermudez SE, et al.  
485 Comparative genomics of the Western Hemisphere soft tick-borne relapsing fever borreliae  
486 highlights extensive plasmid diversity. BMC Genomics. 2022;23(1):410. doi: 10.1186/s12864-022-  
487 08523-7. PubMed PMID: 35641918; PubMed Central PMCID: PMCPMC9158201.
- 488 29. Barbour AG. Plasmid analysis of *Borrelia burgdorferi*, the Lyme disease agent. J Clin Microbiol.  
489 1988;26(3):475-8. doi: 10.1128/jcm.26.3.475-478.1988. PubMed PMID: 3356787; PubMed Central  
490 PMCID: PMCPMC266316.
- 491 30. Schwan TG, Burgdorfer W, Garon CF. Changes in infectivity and plasmid profile of the Lyme  
492 disease spirochete, *Borrelia burgdorferi*, as a result of in vitro cultivation. Infect Immun.  
493 1988;56(8):1831-6. doi: 10.1128/iai.56.8.1831-1836.1988. PubMed PMID: 3397175; PubMed  
494 Central PMCID: PMCPMC259490.
- 495 31. Elias AF, Stewart PE, Grimm D, Caimano MJ, Eggers CH, Tilly K, et al. Clonal polymorphism of  
496 *Borrelia burgdorferi* strain B31 MI: implications for mutagenesis in an infectious strain background.  
497 Infect Immun. 2002;70(4):2139-50. PubMed PMID: 11895980; PubMed Central PMCID:  
498 PMC127854.
- 499 32. Grimm D, Elias AF, Tilly K, Rosa PA. Plasmid stability during in vitro propagation of *Borrelia*  
500 *burgdorferi* assessed at a clonal level. Infect Immun. 2003;71(6):3138-45. PubMed PMID:  
501 12761092; PubMed Central PMCID: PMC155697.
- 502 33. Stewart PE, Thalken R, Bono JL, Rosa P. Isolation of a circular plasmid region sufficient for  
503 autonomous replication and transformation of infectious *Borrelia burgdorferi*. Mol Microbiol.  
504 2001;39(3):714-21. PubMed PMID: 11169111.
- 505 34. Grimm D, Eggers CH, Caimano MJ, Tilly K, Stewart PE, Elias AF, et al. Experimental assessment  
506 of the roles of linear plasmids lp25 and lp28-1 of *Borrelia burgdorferi* throughout the infectious

- 507 cycle. *Infect Immun.* 2004;72(10):5938-46. doi: 10.1128/IAI.72.10.5938-5946.2004. PubMed  
508 PMID: 15385497; PubMed Central PMCID: PMC517563.
- 509 35. Stewart PE, Chaconas G, Rosa P. Conservation of plasmid maintenance functions between linear  
510 and circular plasmids in *Borrelia burgdorferi*. *J Bacteriol.* 2003;185(10):3202-9. PubMed PMID:  
511 12730180; PubMed Central PMCID: PMC154063.
- 512 36. Dulebohn DP, Bestor A, Rego RO, Stewart PE, Rosa PA. *Borrelia burgdorferi* linear plasmid 38 is  
513 dispensable for completion of the mouse-tick infectious cycle. *Infect Immun.* 2011;79(9):3510-7.  
514 doi: 10.1128/IAI.05014-11. PubMed PMID: 21708994; PubMed Central PMCID:  
515 PMCPMC3165476.
- 516 37. Dulebohn DP, Bestor A, Rosa PA. *Borrelia burgdorferi* linear plasmid 28-3 confers a selective  
517 advantage in an experimental mouse-tick infection model. *Infect Immun.* 2013;81(8):2986-96. doi:  
518 10.1128/IAI.00219-13. PubMed PMID: 23753630; PubMed Central PMCID: PMC3719586.
- 519 38. Jewett MW, Byram R, Bestor A, Tilly K, Lawrence K, Burtnick MN, et al. Genetic basis for  
520 retention of a critical virulence plasmid of *Borrelia burgdorferi*. *Mol Microbiol.* 2007;66(4):975-90.  
521 doi: 10.1111/j.1365-2958.2007.05969.x. PubMed PMID: 17919281; PubMed Central PMCID:  
522 PMCPMC2229028.
- 523 39. Eggers CH, Caimano MJ, Clawson ML, Miller WG, Samuels DS, Radolf JD. Identification of loci  
524 critical for replication and compatibility of a *Borrelia burgdorferi* cp32 plasmid and use of a cp32-  
525 based shuttle vector for the expression of fluorescent reporters in the lyme disease spirochaete. *Mol*  
526 *Microbiol.* 2002;43(2):281-95. PubMed PMID: 11985709.
- 527 40. Cui L, Bikard D. Consequences of Cas9 cleavage in the chromosome of *Escherichia coli*. *Nucl*  
528 *Acids Res.* 2016;44(9):4243-51. doi: 10.1093/nar/gkw223. PubMed PMID: 27060147; PubMed  
529 Central PMCID: PMCPMC4872102.
- 530 41. Pennington JM, Rosenberg SM. Spontaneous DNA breakage in single living *Escherichia coli* cells.  
531 *Nat Genet.* 2007;39(6):797-802. doi: 10.1038/ng2051. PubMed PMID: 17529976; PubMed Central  
532 PMCID: PMCPMC2856310.
- 533 42. Bikard D, Hatoum-Aslan A, Mucida D, Marraffini LA. CRISPR interference can prevent natural  
534 transformation and virulence acquisition during in vivo bacterial infection. *Cell Host Microbe.*  
535 2012;12(2):177-86. doi: 10.1016/j.chom.2012.06.003. PubMed PMID: 22901538.
- 536 43. Xu T, Li Y, Shi Z, Hemme CL, Li Y, Zhu Y, et al. Efficient genome editing in *Clostridium*  
537 *cellulolyticum* via CRISPR-Cas9 nickase. *Appl Environ Microbiol.* 2015;81(13):4423-31. doi:  
538 10.1128/AEM.00873-15. PubMed PMID: 25911483; PubMed Central PMCID: PMCPMC4475897.
- 539 44. Fernandes LGV, Guaman LP, Vasconcellos SA, Heinemann MB, Picardeau M, Nascimento A. Gene  
540 silencing based on RNA-guided catalytically inactive Cas9 (dCas9): a new tool for genetic  
541 engineering in *Leptospira*. *Sci Rep.* 2019;9(1):1839. doi: 10.1038/s41598-018-37949-x. PubMed  
542 PMID: 30755626; PubMed Central PMCID: PMC6372684.
- 543 45. Prister LL, Xu J, Seifert HS. A double-strand break does not promote *Neisseria gonorrhoeae* pilin  
544 antigenic variation. *J Bacteriol.* 2019;201(13). doi: 10.1128/JB.00256-19. PubMed PMID:  
545 30988037; PubMed Central PMCID: PMCPMC6560144.
- 546 46. Jinek M, Chylinski K, Fonfara I, Hauer M, Doudna JA, Charpentier E. A programmable dual-RNA-  
547 guided DNA endonuclease in adaptive bacterial immunity. *Science.* 2012;337(6096):816-21. doi:  
548 10.1126/science.1225829. PubMed PMID: 22745249; PubMed Central PMCID: PMCPMC6286148.
- 549 47. Bolotin A, Quinquis B, Sorokin A, Ehrlich SD. Clustered regularly interspaced short palindrome  
550 repeats (CRISPRs) have spacers of extrachromosomal origin. *Microbiology.* 2005;151(Pt 8):2551-  
551 61. doi: 10.1099/mic.0.28048-0. PubMed PMID: 16079334.

- 552 48. Koonin EV, Makarova KS, Zhang F. Diversity, classification and evolution of CRISPR-Cas  
553 systems. *Curr Opin Microbiol.* 2017;37:67-78. doi: 10.1016/j.mib.2017.05.008. PubMed PMID:  
554 28605718; PubMed Central PMCID: PMC5776717.
- 555 49. Larson MH, Gilbert LA, Wang X, Lim WA, Weissman JS, Qi LS. CRISPR interference (CRISPRi)  
556 for sequence-specific control of gene expression. *Nat Prot.* 2013;8(11):2180-96. doi:  
557 10.1038/nprot.2013.132. PubMed PMID: 24136345; PubMed Central PMCID: PMC3922765.
- 558 50. Qi LS, Larson MH, Gilbert LA, Doudna JA, Weissman JS, Arkin AP, et al. Repurposing CRISPR as  
559 an RNA-guided platform for sequence-specific control of gene expression. *Cell.* 2013;152(5):1173-  
560 83. doi: 10.1016/j.cell.2013.02.022. PubMed PMID: 23452860; PubMed Central PMCID:  
561 PMC3664290.
- 562 51. Takacs CN, Scott M, Chang Y, Kloos ZA, Irnov I, Rosa PA, et al. A CRISPR interference platform  
563 for selective downregulation of gene expression in *Borrelia burgdorferi*. *Appl Environ Microbiol.*  
564 2021;87:e02519-20. doi: 10.1128/AEM.02519-20. PubMed PMID: 33257311; PubMed Central  
565 PMCID: PMC7851697.
- 566 52. Labandeira-Rey M, Skare JT. Decreased infectivity in *Borrelia burgdorferi* strain B31 is associated  
567 with loss of linear plasmid 25 or 28-1. *Infect Immun.* 2001;69(1):446-55. doi: 10.1128/IAI.69.1.446-  
568 455.2001. PubMed PMID: 11119536; PubMed Central PMCID: PMC97902.
- 569 53. Purser JE, Lawrenz MB, Caimano MJ, Howell JK, Radolf JD, Norris SJ. A plasmid-encoded  
570 nicotinamidase (PncA) is essential for infectivity of *Borrelia burgdorferi* in a mammalian host. *Mol*  
571 *Microbiol.* 2003;48(3):753-64. doi: 10.1046/j.1365-2958.2003.03452.x. PubMed PMID: 12694619.
- 572 54. Strother KO, de Silva A. Role of *Borrelia burgdorferi* linear plasmid 25 in infection of *Ixodes*  
573 *scapularis* ticks. *J Bacteriol.* 2005;187(16):5776-81. doi: 10.1128/JB.187.16.5776-5781.2005.  
574 PubMed PMID: 16077125; PubMed Central PMCID: PMC1196075.
- 575 55. Grimm D, Tilly K, Bueschel DM, Fisher MA, Policastro PF, Gherardini FC, et al. Defining plasmids  
576 required by *Borrelia burgdorferi* for colonization of tick vector *Ixodes scapularis* (Acari: Ixodidae).  
577 *J Med Entomol.* 2005;42(4):676-84. doi: 10.1093/jmedent/42.4.676. PubMed PMID: 16119559.
- 578 56. Strother KO, Broadwater A, De Silva A. Plasmid requirements for infection of ticks by *Borrelia*  
579 *burgdorferi*. *Vector Borne and Zoonotic Dis.* 2005;5(3):237-45. doi: 10.1089/vbz.2005.5.237.  
580 PubMed PMID: 16187892.
- 581 57. Zhang JR, Hardham JM, Barbour AG, Norris SJ. Antigenic variation in Lyme disease borreliae by  
582 promiscuous recombination of VMP-like sequence cassettes. *Cell.* 1997;89(2):275-85. doi:  
583 10.1016/s0092-8674(00)80206-8. PubMed PMID: 9108482.
- 584 58. Norris SJ. vls Antigenic variation systems of Lyme disease *Borrelia*: eluding host immunity through  
585 both random, segmental gene conversion and framework heterogeneity. *Microbiol Spectrum.*  
586 2014;2(6). doi: 10.1128/microbiolspec.MDNA3-0038-2014. PubMed PMID: 26104445; PubMed  
587 Central PMCID: PMC4480602.
- 588 59. Rego RO, Bestor A, Rosa PA. Defining the plasmid-borne restriction-modification systems of the  
589 Lyme disease spirochete *Borrelia burgdorferi*. *J Bacteriol.* 2011;193(5):1161-71. doi:  
590 10.1128/JB.01176-10. PubMed PMID: 21193609; PubMed Central PMCID: PMC3067601.
- 591 60. Wenger AM, Peluso P, Rowell WJ, Chang PC, Hall RJ, Concepcion GT, et al. Accurate circular  
592 consensus long-read sequencing improves variant detection and assembly of a human genome. *Nat*  
593 *Biotechnol.* 2019;37(10):1155-62. doi: 10.1038/s41587-019-0217-9. PubMed PMID: 31406327;  
594 PubMed Central PMCID: PMC6776680.
- 595 61. Bunikis I, Kutschan-Bunikis S, Bonde M, Bergstrom S. Multiplex PCR as a tool for validating  
596 plasmid content of *Borrelia burgdorferi*. *J Microbiol Methods.* 2011;86(2):243-7. doi:  
597 10.1016/j.mimet.2011.05.004. PubMed PMID: 21605603.

- 598 62. Hardy PO, Chaconas G. The nucleotide excision repair system of *Borrelia burgdorferi* is the sole  
599 pathway involved in repair of DNA damage by UV light. *J Bacteriol.* 2013;195(10):2220-31. doi:  
600 10.1128/JB.00043-13. PubMed PMID: 23475971; PubMed Central PMCID: PMC3650546.
- 601 63. Chaconas G, Norris SJ. Peaceful coexistence amongst *Borrelia* plasmids: getting by with a little help  
602 from their friends? *Plasmid.* 2013;70(2):161-7. doi: 10.1016/j.plasmid.2013.05.002. PubMed PMID:  
603 23727020; PubMed Central PMCID: PMC3737319.
- 604 64. Tilly K, Checroun C, Rosa PA. Requirements for *Borrelia burgdorferi* plasmid maintenance.  
605 *Plasmid.* 2012;68(1):1-12. doi: 10.1016/j.plasmid.2012.01.009. PubMed PMID: 22289894; PubMed  
606 Central PMCID: PMC3367046.
- 607 65. Baxter JC, Funnell BE. Plasmid partition mechanisms. *Microbiol Spectrum.* 2014;2(6). doi:  
608 10.1128/microbiolspec.PLAS-0023-2014. PubMed PMID: 26104442.
- 609 66. Call SN, Andrews LB. CRISPR-based approaches for gene regulation in non-model bacteria. *Front*  
610 *Genome Ed.* 2022;4:892304. doi: 10.3389/fgeed.2022.892304. PubMed PMID: 35813973; PubMed  
611 Central PMCID: PMC9260158.
- 612 67. Takacs CN, Kloos ZA, Scott M, Rosa PA, Jacobs-Wagner C. Fluorescent proteins, promoters, and  
613 selectable markers for applications in the Lyme disease spirochete *Borrelia burgdorferi*. *Appl*  
614 *Environ Microbiol.* 2018;84(24). doi: 10.1128/AEM.01824-18. PubMed PMID: 30315081; PubMed  
615 Central PMCID: PMC6275353.
- 616 68. Green MR, Sambrook J. Precipitation of DNA with ethanol. *Cold Spring Harb Protoc.*  
617 2016;2016(12):1116-20. doi: 10.1101/pdb.prot093377. PubMed PMID: 27934690.
- 618 69. Barbour AG. Isolation and cultivation of Lyme disease spirochetes. *Yale J Biol Med.*  
619 1984;57(4):521-5. PubMed PMID: 6393604; PubMed Central PMCID: PMC2589996.
- 620 70. Zuckert WR. Laboratory maintenance of *Borrelia burgdorferi*. *Curr Prot Microbiol.* 2007;Chapter  
621 12:Unit 12C 1. doi: 10.1002/9780471729259.mc12c01s4. PubMed PMID: 18770608.
- 622 71. Jutras BL, Chenail AM, Stevenson B. Changes in bacterial growth rate govern expression of the  
623 *Borrelia burgdorferi* OspC and Erp infection-associated surface proteins. *J Bacteriol.*  
624 2013;195(4):757-64. doi: 10.1128/JB.01956-12. PubMed PMID: 23222718; PubMed Central  
625 PMCID: PMC3562092.
- 626 72. Bono JL, Elias AF, Kupko JJ, 3rd, Stevenson B, Tilly K, Rosa P. Efficient targeted mutagenesis in  
627 *Borrelia burgdorferi*. *J Bacteriol.* 2000;182(9):2445-52. PubMed PMID: 10762244; PubMed Central  
628 PMCID: PMC111306.
- 629 73. Elias AF, Bono JL, Kupko JJ, 3rd, Stewart PE, Krum JG, Rosa PA. New antibiotic resistance  
630 cassettes suitable for genetic studies in *Borrelia burgdorferi*. *J Mol Microbiol Biotechnol.*  
631 2003;6(1):29-40. doi: 10.1159/000073406. PubMed PMID: 14593251.
- 632 74. Frank KL, Bundle SF, Kresge ME, Eggers CH, Samuels DS. *aadA* confers streptomycin resistance  
633 in *Borrelia burgdorferi*. *J Bacteriol.* 2003;185(22):6723-7. PubMed PMID: 14594849; PubMed  
634 Central PMCID: PMC262111.
- 635 75. Tilly K, Elias AF, Bono JL, Stewart P, Rosa P. DNA exchange and insertional inactivation in  
636 spirochetes. *J Mol Microbiol Biotechnol.* 2000;2(4):433-42. PubMed PMID: 11075915.

637

638 **Supplementary Figure 1. Transformation statistics. A.** Transformation yield, defined as number of  
639 shuttle vector-transformed colony forming units (cfu) per mL culture measured by plating under  
640 streptomycin selection one day after electroporation. The experiment numbers are the same as in Tables  
641 4 and 5 and are listed at the bottom. Recipient strains are also listed at the bottom. **B.** Plot showing the  
642 distribution of transformation frequency values measured in experiment 3 described in (A) and Tables 4  
643 and 5. The transformation frequency is defined as the ratio of the number of cells that got transformed  
644 with the Cas9 shuttle vector to the number of cells that survived electroporation. Transformed and viable  
645 cell numbers were measured by plating the electroporated cells in the presence or absence of  
646 streptomycin. **C.** Plot showing the limit of detection of cells that retained the targeted endogenous  
647 plasmid for the individual electroporations performed in experiments 1 through 3 as described in panel  
648 (A) and Tables 4 and 5. The limit of detection values were calculated as follows. First, we counted the  
649 number of colonies obtained by plating the electroporated *B. burgdorferi* cultures under streptomycin  
650 selection and added the values we counted on the plates seeded with the 100, 300, and 900  $\mu$ L cell  
651 culture volumes (1.3 mL total, also see Methods). If plates seeded with larger volumes of culture yielded  
652 too many colonies to allow an accurate count, the number of colony-forming cells in 1.3 mL culture was  
653 estimated from the number of colonies counted on plates seeded with the lesser culture volume(s). The  
654 limit of detection value was then calculated as the inverse of the number of colonies obtained from  
655 plating 1.3 mL electroporated culture. Labels are as in (A).

## Figure 1

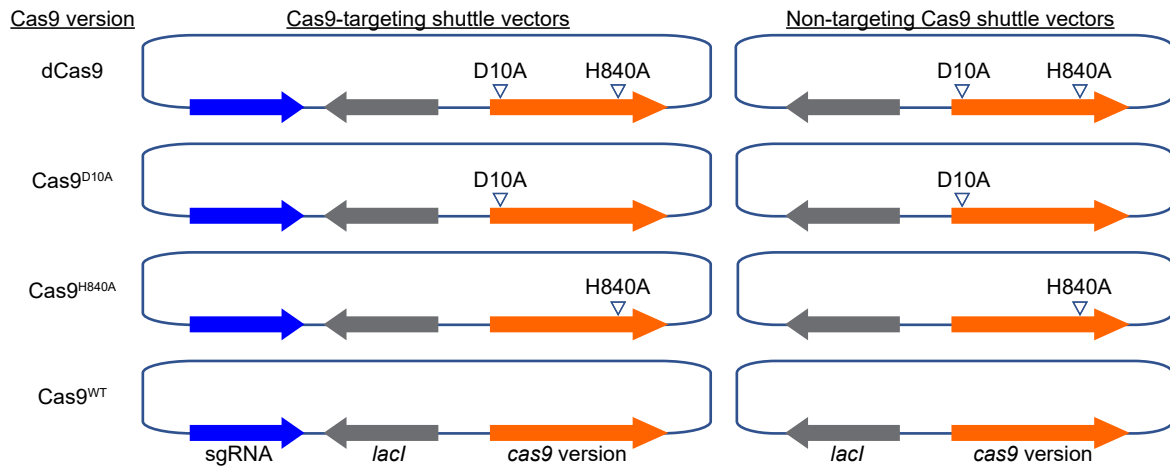

## Figure 2

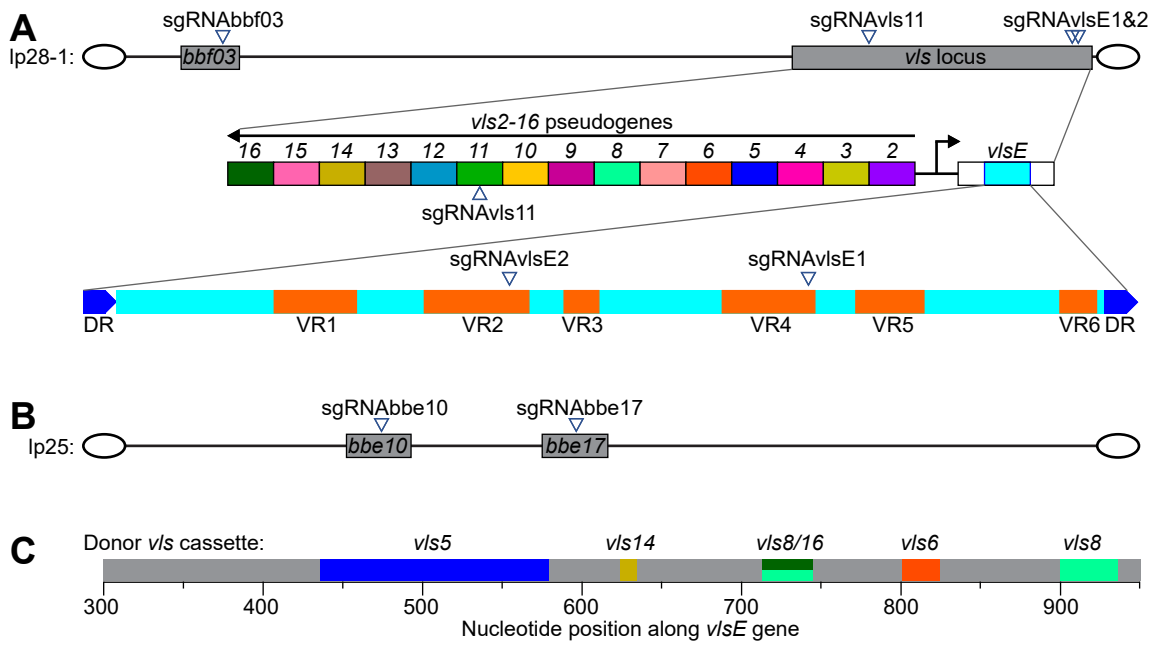



### Figure 3

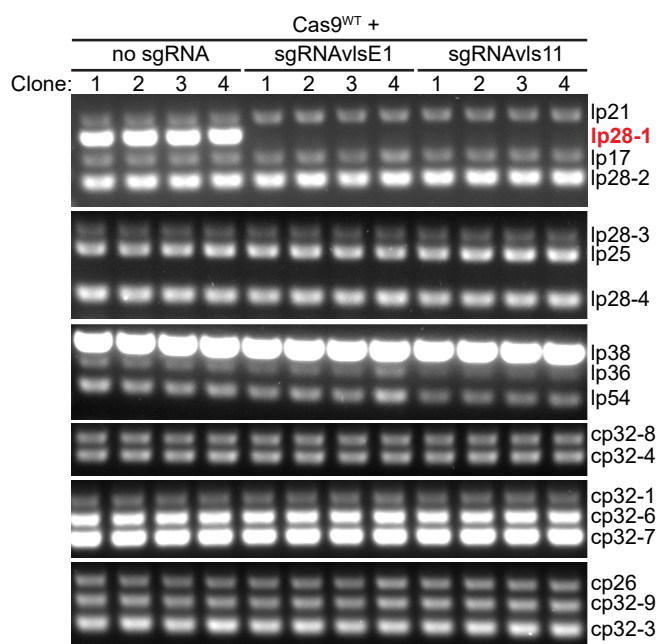

## Figure 4

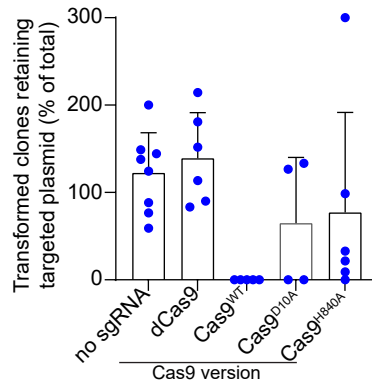

## Figure S1

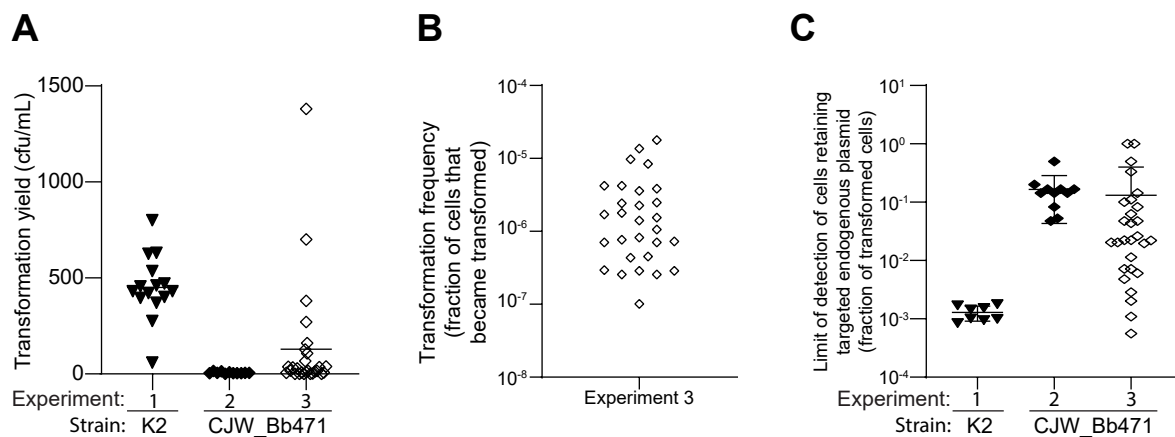

Source: https://www.biorxiv.org/content/10.1101/2022.09.22.509095v1.full.pdf
